# Supplementary material for: Comparing effectiveness of image perturbation and test retest imaging in improving radiomic model reliability
Source: PubMed Central journal article supplement (PMC10600245; doi:10.1038/s41598-023-45477-6), 2023-10-25
Supplement: 41598_2023_45477_MOESM1_ESM.pdf [file 41598_2023_45477_MOESM1_ESM.pdf]

Table S1. Selected radiomics features for model development

| ICC   | Perturbation    |               |                              | Test-retest     |               |                                          |
|-------|-----------------|---------------|------------------------------|-----------------|---------------|------------------------------------------|
|       | Image filter    | Feature class | Feature name                 | Image filter    | Feature class | Feature name                             |
| >0    | Wavelet (HHH)   | ngtdm         | Strength                     | Wavelet (HHH)   | ngtdm         | Strength                                 |
|       | LoG (sigma=5mm) | firstorder    | 10Percentile                 | LoG (sigma=5mm) | firstorder    | 10Percentile                             |
|       | Wavelet (LHL)   | glcm          | JointAverage                 | Wavelet (LHL)   | glcm          | JointAverage                             |
|       | Wavelet (HHH)   | firstorder    | Skewness                     | Wavelet (HHH)   | firstorder    | Skewness                                 |
|       | LoG (sigma=1mm) | glcm          | MCC                          | LoG (sigma=1mm) | glcm          | MCC                                      |
| >0.5  | Wavelet (HHH)   | ngtdm         | Strength                     | Wavelet (HHH)   | ngtdm         | Strength                                 |
|       | LoG (sigma=5mm) | firstorder    | 10Percentile                 | LoG (sigma=5mm) | firstorder    | 10Percentile                             |
|       | Original        | shape         | Elongation                   | Original        | shape         | Skewness                                 |
|       | LoG (sigma=2mm) | glszm         | LowGrayLevelZone<br>Emphasis | Original        | shape         | Elongation                               |
|       | LoG (sigma=3mm) | firstorder    | InterquartileRange           | Wavelet (LLH)   | glcm          | ClusterShade                             |
| >0.75 | Wavelet (HHH)   | ngtdm         | Strength                     | Original        | shape         | MajorAxisLength                          |
|       | LoG (sigma=5mm) | firstorder    | 10Percentile                 | LoG (sigma=5mm) | firstorder    | Median                                   |
|       | Original        | shape         | Elongation                   | Wavelet (LLH)   | glcm          | ClusterShade                             |
|       | LoG (sigma=3mm) | firstorder    | InterquartileRange           | LoG (sigma=4mm) | firstorder    | Minimum                                  |
|       | Original        | glszm         | ZoneEntropy                  | Wavele (HHH)    | ngtdm         | Coarseness                               |
| >0.9  | Original        | shape         | MajorAxisLength              | Original        | shape         | Maximum3DDiameter                        |
|       | Wavelet (LHH)   | firstorder    | InterquartileRange           | LoG (sigma=5mm) | firstorder    | Mean                                     |
|       | LoG (sigma=5mm) | firstorder    | Range                        | Original        | firstorder    | 90Percentile                             |
|       | Original        | shape         | Elongation                   | LoG (sigma=4mm) | gldm          | SmallDependenceHigh<br>GrayLevelEmphasis |
|       | Original        | shape         | Maximum2DDiam<br>eterColumn  | Wavelet (LLL)   | firstorder    | 90Percentile                             |
| >0.95 | Original        | shape         | MajorAxisLength              | Original        | firstorder    | 90Percentile                             |
|       | LoG (sigma=5mm) | firstorder    | Median                       | LoG (sigma=3mm) | firstorder    | Mean                                     |
|       | Original        | shape         | Maximum2DDiam<br>eterColumn  | Wavelet (LLL)   | firstorder    | 90Percentile                             |
|       | Original        | shape         | Maximum3DDiam<br>eterColumn  | Wavele (LLL)    | firstorder    | Median                                   |
|       | Original        | shape         | Maximum2DDiam<br>eterRow     | Original        | firstorder    | Median                                   |
